# Supplementary material
Source: Springer Nature journal article supplement (https://www.springermedizin.de/resource/supplementary/12936_2012_2163_MOESM3_ESM.pdf/9542698)

a) Males aged 15-24 years

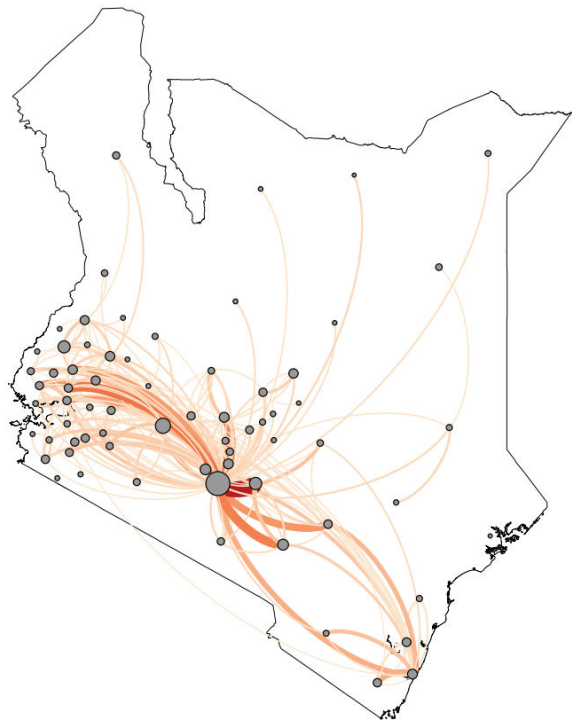

b) Children aged < 5 years

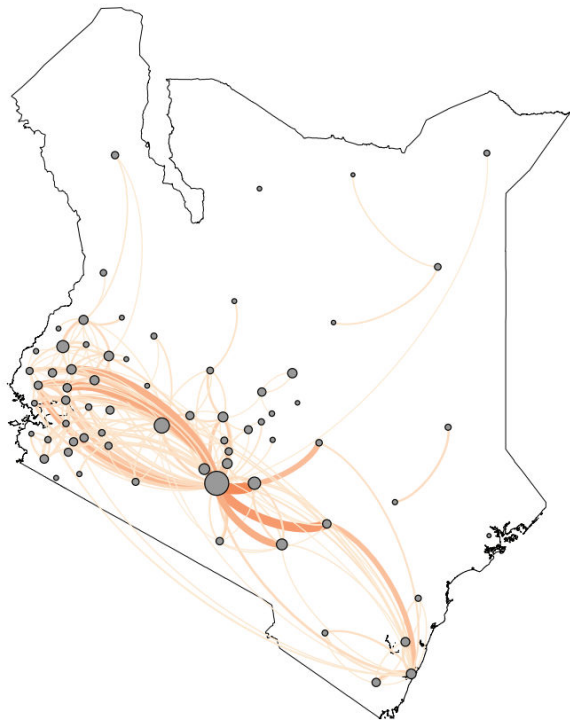

Supplement: MOESM3 [file 9542698]
